# Supplementary material for: Land-Use Effect on Olive Groves Pest Prays oleae and on Its Potential Biocontrol Agent Chrysoperla carnea
Source: MDPI journal article supplement (doi:10.3390/insects12010046), 2021-01-08
Supplement: s1 [file s1]

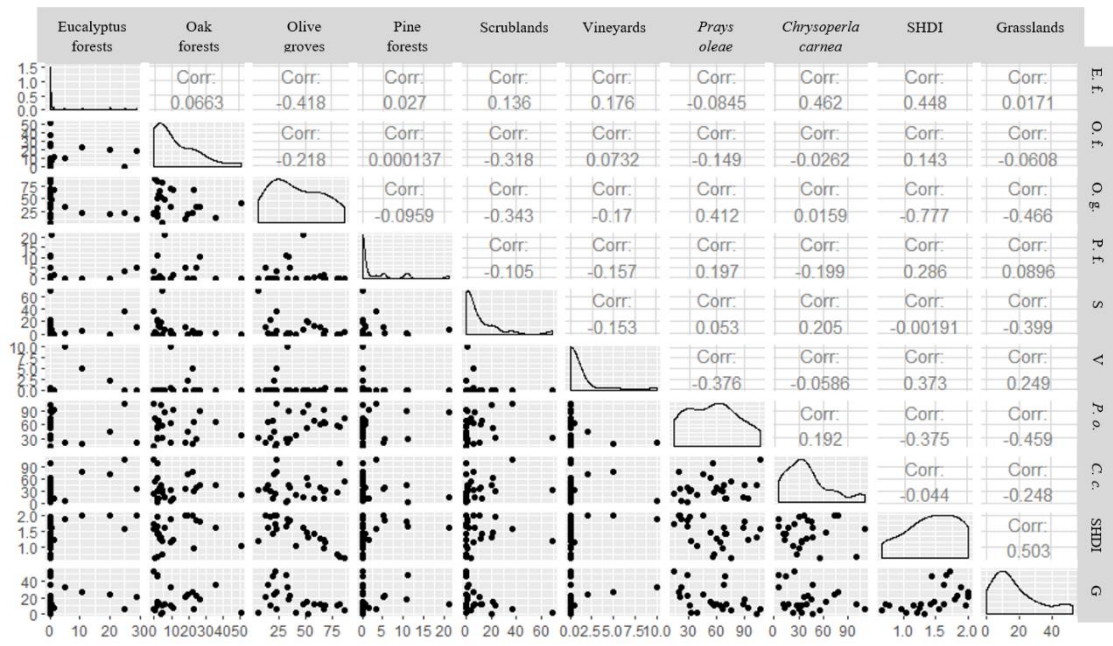

Figure S1. Correlations of the different predictor variables included in the models.

**Table S1.** Estimated parameters of the selected model for the *Prays oleae* infestation. Pr ( $<|z|$ ) shows the level of support of these parameters.

|                                                       | <b>Estimate</b> | <b>Pr (<math>&lt; z </math>)</b> |
|-------------------------------------------------------|-----------------|----------------------------------|
| Intercept                                             | -3.1380         | <0.001                           |
| Surrounding olive groves (%)                          | 0.0372          | <0.001                           |
| <i>C. carnea</i> abundance                            | 0.0246          | <0.001                           |
| Interaction (Olive groves $\times$ <i>C. carnea</i> ) | -0.0007         | <0.001                           |
